# Supplementary material for: Exploring the Impact of Formal and Informal Network Consistency on Job Performance in Hypertension Management Teams: A Cross-Sectional Study
Source: Research Square preprint supplement (doi:10.21203/rs.3.rs-8190499/v1), 2025-12-22
Supplement: Supplementary file 1 [file 7765fc0ae7b279a0f76be2da.docx]

**Online Appendix**

**A Questionnaire and Sample Data**

**A1 Survey on the Impact of Formal and Informal Networks on the Work Performance of Hypertension Care Managers**

**Table A1a. Basic Information**

| 1. Your employing organization: |
| --- |
| 2. Gender: (1) Male, (2) Female |
| 3. Age: |
| 4. Marital status: (1) Never married, (2) Married, (3) Divorced, (4) Widowed |
| 5. Health status: (1) Healthy, (2) Suboptimal health (“subhealth”), (3) Diagnosed illness (such as chronic condition) |
| 6. Employment or appointment type: (1) Permanent (establishment), (2) Contract, (3) Other |
| 7. Years of service in the current organization: (1) ≤ 1 year, (2) 2–5 years, (3) 6–10 years, (4) 11–15 years, (5) ≥ 16 years |
| 8. Highest educational attainment: (1) High school or below, (2) Secondary specialized/technical school, (3) Junior college (Associate), (4) Bachelor’s, (5) Master’s or above |
| 9. Job type: (1) Clinical physician, (2) Nursing staff, (3) Auxiliary department staff, (4) Public health physician, (5) Other |
| 10. Professional licensure: (1) Licensed Assistant Physician, (2) Licensed Physician, (3) Licensed Nurse, (4) Other |
| 11. Professional title (technical rank): (1) Junior, (2) Intermediate, (3) Senior, (4) None |
| 12. Average monthly salary: |

**Table A1b. Personal Work Performance.**

| **Task Performance (TP)** | **Strongly disagree** | **Disagree** | **Neither agree nor disagree** | **Agree** | **Strongly agree** |
| --- | --- | --- | --- | --- | --- |
| 1. I am able to complete the work tasks assigned to me. | 1 | 2 | 3 | 4 | 5 |
| 2. I am able to perform my job duties in accordance with the chronic disease management service protocols. | 1 | 2 | 3 | 4 | 5 |
| 3. I am able to complete my work tasks in my preferred manner. | 1 | 2 | 3 | 4 | 5 |
| 4. I am able to complete my work tasks in line with the requirements of the formal performance appraisal. | 1 | 2 | 3 | 4 | 5 |
| **Relationship Performance (RP)** | **Strongly disagree** | **Disagree** | **Neither agree nor disagree** | **Agree** | **Strongly agree** |
| 1. I often support and encourage colleagues at my level. | 1 | 2 | 3 | 4 | 5 |
| 2. I voluntarily undertake many tasks that benefit the organization. | 1 | 2 | 3 | 4 | 5 |
| 3. I comply with all rules and regulations related to chronic disease management work. | 1 | 2 | 3 | 4 | 5 |
| 4. I frequently provide constructive suggestions for the team’s chronic disease management decisions. | 1 | 2 | 3 | 4 | 5 |
| 5. I maintain a professional appearance and demonstrate polite, well-mannered conduct. | 1 | 2 | 3 | 4 | 5 |
| 6. I am adept at developing personal discipline and self-control. | 1 | 2 | 3 | 4 | 5 |
| **Learning Performance (LP)** | **Strongly disagree** | **Disagree** | **Neither agree nor disagree** | **Agree** | **Strongly agree** |
| 1. I frequently acquire professional skills through ongoing learning. | 1 | 2 | 3 | 4 | 5 |
| 2. I frequently enhance my professional knowledge through learning. | 1 | 2 | 3 | 4 | 5 |
| 3. Through learning, I am better able to fulfill my current job responsibilities. | 1 | 2 | 3 | 4 | 5 |
| 4. I frequently apply newly learned knowledge to solve problems encountered at work. | 1 | 2 | 3 | 4 | 5 |
| **Innovation Performance (IP)** | **Strongly disagree** | **Disagree** | **Neither agree nor disagree** | **Agree** | **Strongly agree** |
| 1. I frequently propose new ideas to improve the status quo. | 1 | 2 | 3 | 4 | 5 |
| 2. I proactively support innovative ideas. | 1 | 2 | 3 | 4 | 5 |
| 3. I frequently seek new work methods, skills, or tools through learning. | 1 | 2 | 3 | 4 | 5 |
| 4. I frequently receive recognition or rewards for offering innovative suggestions. | 1 | 2 | 3 | 4 | 5 |
| 5. I frequently translate innovative ideas into practical applications. | 1 | 2 | 3 | 4 | 5 |
| 6. Through learning, I frequently propose original solutions to problems. | 1 | 2 | 3 | 4 | 5 |
| **Objective Performance:** The Basic Public Health Services performance assessment score/grade for the first half of 2023 is ____. | | | | | |

**Table A1c. Social Network Profile.**

Participant identification code: _____.

| **Reciprocal Workflow Network**  (during hypertension management service delivery) | Colleague ID | Colleague ID | Colleague ID | Colleague ID | Colleague ID |
| --- | --- | --- | --- | --- | --- |
| 1. Please list the team members with whom you must communicate and coordinate to complete your work tasks. |  |  |  |  |  |
| **Sequential Workflow Network**  (during chronic disease management) | Colleague ID | Colleague ID | Colleague ID | Colleague ID | Colleague ID |
| 1. Please list the team members to whom your work tasks are handed off after you complete them. |  |  |  |  |  |
| 2. Please list the team members who hand work off to you after they complete their tasks. |  |  |  |  |  |
| **Advice Network (AN)** | Colleague ID | Colleague ID | Colleague ID | Colleague ID | Colleague ID |
| 1. Please list the team members whom you consult when you encounter difficulties at work. |  |  |  |  |  |
| 2. Please list the team members with whom you routinely discuss professional matters in the course of daily work. |  |  |  |  |  |
| 3. Please list the team members who take the initiative to help you when you face difficulties at work. |  |  |  |  |  |
| **Friendship Network (FN)** | Colleague ID | Colleague ID | Colleague ID | Colleague ID | Colleague ID |
| 1. Please list the team members to whom you confide when you experience setbacks or criticism at work. |  |  |  |  |  |
| 2. Please list the team members with whom conversations commonly include topics about family life. |  |  |  |  |  |
| 3. Please list the team members with whom you are most familiar. |  |  |  |  |  |

**Table A2. Basic Characteristics of Hypertension Management Personnel (N = 401).**

| **Variable** | **Category** | **n** | **Proportion (%)** |
| --- | --- | --- | --- |
| District | **Shangcheng District** | 118 | 29.4 |
|  | **Xihu District** | 95 | 23.7 |
|  | **Gongshu District** | 188 | 46.9 |
| Gender | **Male** | 62 | 15.5 |
|  | **Female** | 339 | 84.5 |
| Age | **≤ 30 years** | 49 | 12.2 |
|  | **31–40 years** | 169 | 42.1 |
|  | **41–50 years** | 141 | 35.2 |
|  | **> 50 years** | 42 | 10.5 |
| Health status | Healthy | 250 | 62.3 |
|  | Subhealth | 128 | 32.0 |
|  | Illness | 23 | 5.7 |
| Employment type | Permanent (establishment) | 277 | 69.1 |
|  | Contract | 113 | 28.2 |
|  | Other | 11 | 2.7 |
| Years in position | 5 years or less | 89 | 22.2 |
|  | 6–10 years | 79 | 19.7 |
|  | 11–15 years | 93 | 23.2 |
|  | 16 years or more | 140 | 34.9 |
| Highest educational attainment | Associate degree or below | 61 | 15.2 |
|  | Bachelor's degree | 310 | 77.3 |
|  | Master's degree or higher | 30 | 7.5 |
| Job type | Clinical physician | 169 | 42.1 |
|  | Nursing staff | 185 | 46.2 |
|  | Auxiliary department staff | 23 | 5.7 |
|  | Public health physician | 11 | 2.8 |
|  | Other | 13 | 3.2 |
| Professional title | Junior | 79 | 19.7 |
|  | Intermediate | 227 | 56.6 |
|  | Senior | 82 | 20.5 |
|  | None | 13 | 3.2 |
| Average monthly salary (CNY) | Below 4,500 yuan | 85 | 21.2 |
|  | 4,500–6,499 yuan | 190 | 47.4 |
|  | 6,500–8,499 yuan | 61 | 15.2 |
|  | 8,500 yuan or more | 65 | 16.2 |

**B. Reliability and Validity Analysis**

**Table B1. Reliability Results.**

| **Variable** | **Cronbach's α** | **CR** | **Number of Items** |
| --- | --- | --- | --- |
| Task Performance | 0.912 | 0.913 | 4 |
| Relationship Performance | 0.867 | 0.870 | 6 |
| Learning Performance | 0.898 | 0.903 | 4 |
| Innovation Performance | 0.898 | 0.902 | 6 |

**Table B2. Results of the KMO and Bartlett’s Test of Sphericity.**

| KMO |  | 0.930 |
| --- | --- | --- |
| Bartlett’s Test of Sphericity | Approximate Chi-Square (Approx. χ²) | 5471.963 |
|  | Degrees of Freedom (df) | 190 |
|  | Significance (*p*-value) | ˂ 0.001 |

**Table B3. Factor Variance Percent of Questionnaire.**

| **Factor** | **Eigen value** | **Variance Percent (%)** | **Cumulative Variance Percent (%)** |
| --- | --- | --- | --- |
| 1 | 8.84 | 20.748 | 20.748 |
| 2 | 2.884 | 17.816 | 38.564 |
| 3 | 1.48 | 16.919 | 55.483 |
| 4 | 1.018 | 15.630 | 71.114 |

*Note:* Factor 1 = Task Performance; Factor 2 = Performance; Factor 3 = Learning Performance; Factor 4 = Innovation Performance.

**Table B4. Rotated Component Matrix for the Work Performance Questionnaire.**

| **Item** | **Factor** | | | |
| --- | --- | --- | --- | --- |
| **1** | **2** | **3** | **4** |
| TP1 | 0.831 |  |  |  |
| TP2 | 0.867 |  |  |  |
| TP3 | 0.842 |  |  |  |
| TP4 | 0.800 |  |  |  |
| RP1 |  | 0.617 |  |  |
| RP2 |  | 0.732 |  |  |
| RP3 |  | 0.697 |  |  |
| RP4 |  | 0.681 |  |  |
| RP5 |  | 0.752 |  |  |
| RP6 |  | 0.591 |  |  |
| LP1 |  |  | 0.793 |  |
| LP2 |  |  | 0.794 |  |
| LP3 |  |  | 0.774 |  |
| LP4 |  |  | 0.643 |  |
| IP1 |  |  |  | 0.743 |
| IP2 |  |  |  | 0.694 |
| IP3 |  |  |  | 0.671 |
| IP4 |  |  |  | 0.822 |
| IP5 |  |  |  | 0.882 |
| IP6 |  |  |  | 0.848 |

**Table B5. Structural Equation Model Fit Indices.**

| **Fit Index** | **Fit Criterion** | **Result** |
| --- | --- | --- |
| X2/df | 1.000 ˂ X2/df ˂ 5.000 | 3.617 |
| SRMR | ˂ 0.050 (Good); ˂ 0.080 (Reasonable) | 0.076 |
| RMSEA | ˂ 0.050 (Good); ˂ 0.080 (Reasonable) | 0.081 |
| GFI | > 0.800 (Acceptable); > 0.900 (Good) | 0.854 |
| AGFI | > 0.800 (Acceptable); > 0.900 (Good) | 0.813 |
| IFI | > 0.800 (Acceptable); > 0.900 (Good) | 0.921 |
| CFI | > 0.800 (Acceptable); > 0.900 (Good) | 0.920 |
| TLI | > 0.800 (Acceptable); > 0.900 (Good) | 0.908 |

**Table B6. Factor Loadings and AVE of the Work Performance Questionnaire.**

| **Dimension** | **Item** | **Factor Loading** | **AVE** |
| --- | --- | --- | --- |
| Task Performance | TP1 | 0.861 | 0.724 |
| TP2 | 0.890 |
| TP3 | 0.841 |
| TP4 | 0.810 |
| Relationship Performance | RP1 | 0.651 | 0.528 |
| RP2 | 0.741 |
| RP3 | 0.750 |
| RP4 | 0.720 |
| RP5 | 0.769 |
| RP6 | 0.725 |
| Learning Performance | LP1 | 0.857 | 0.700 |
| LP2 | 0.869 |
| LP3 | 0.859 |
| LP4 | 0.757 |
| Innovation Performance | IP1 | 0.755 | 0.605 |
| IP2 | 0.753 |
| IP3 | 0.718 |
| IP4 | 0.735 |
| IP5 | 0.848 |
| IP6 | 0.849 |

**Table B7. Correlation Coefficients and Square Root of AVE.**

|  | TP | RP | LP | IP |
| --- | --- | --- | --- | --- |
| TP | **0.851** |  |  |  |
| RP | 0.203 | **0.727** |  |  |
| LP | 0.205 | 0.242 | **0.837** |  |
| IP | 0.102 | 0.167 | 0.156 | **0.778** |

*Note:* Diagonal entries (in bold) are the square roots of AVE; the lower-triangular elements (below the diagonal) report Pearson correlations among the latent variables.

**C Hypothesis Testing Results**

**Table C1. Results of the Independent-Samples t Test and One-way ANOVA.**

| **Variable** | **Category** | **TP** | **RP** | **LP** | **IP** | **WP** |
| --- | --- | --- | --- | --- | --- | --- |
| **± *s*** | **± *s*** | **± *s*** | **± *s*** | **± *s*** |
| Gender | **Male** | 4.25 ± 0.56 | 4.23 ± 0.48 | 4.21 ± 0.55 | 3.92 ± 0.65 | 82.75 ± 9.05 |
| **Female** | 4.26 ± 0.63 | 4.11 ± 0.59 | 4.14 ± 0.61 | 3.55 ± 0.72 | 79.68 ± 10.21 |
|  | *t*(P) | –0.162 (0.871) | 1.665 (0.099) | 0.750 (0.455) | 3.979 (˂ 0.001***) | 2.410 (0.018*) |
| Age | **≤ 30 years** | 4.35 ± 0.47 | 4.06 ± 0.64 | 4.08 ± 0.54 | 3.54 ± 0.68 | 79.42 ± 9.58 |
| **31–40 years** | 4.21 ± 0.67 | 4.07 ± 0.62 | 4.13 ± 0.66 | 3.63 ± 0.73 | 79.60 ± 11.09 |
| **41–50 years** | 4.30 ± 0.61 | 4.19 ± 0.52 | 4.17 ± 0.55 | 3.57 ± 0.72 | 80.51 ± 9.31 |
| **> 50 years** | 4.23 ± 0.65 | 4.25 ± 0.48 | 4.28 ± 0.55 | 3.73 ± 0.71 | 82.04 ± 8.96 |
|  | χ2(*P*) | 0.952 (0.415) | 1.923 (0.125) | 1.008 (0.389) | 0.723 (0.539) | 0.802 (0.493) |
| Health status | Healthy | 4.32 ± 0.59 | 4.15 ± 0.59 | 4.17 ± 0.63 | 3.67 ± 0.75 | 80.92 ± 10.45 |
| Subhealth | 4.20 ± 0.65 | 4.10 ± 0.56 | 4.15 ± 0.55 | 3.49 ± 0.69 | 79.07 ± 9.33 |
| Illness | 4.02 ± 0.69 | 4.04 ± 0.56 | 4.01 ± 0.51 | 3.57 ± 0.52 | 77.82 ± 9.69 |
|  | χ2(*P*) | 3.409 (0.034) | 0.535 (0.586) | 0.743 (0.476) | 2.507 (0.083) | 2.095 (0.124) |
| Employment type | Permanent | 4.25 ± 0.63 | 4.13 ± 0.57 | 4.14 ± 0.60 | 3.61 ± 0.72 | 80.09 ± 10.04 |
| Contract | 4.26 ± 0.61 | 4.11 ± 0.59 | 4.17 ± 0.59 | 3.59 ± 0.68 | 79.98 ± 9.88 |
|  | Other | 4.56 ± 0.52 | 4.39 ± 0.68 | 4.25 ± 0.67 | 3.65 ± 1.14 | 83.54 ± 13.56 |
|  | χ2(*P*) | 1.339 (0.263) | 1.162 (0.314) | 0.231 (0.794) | 0.073 (0.93) | 0.641 (0.527) |
| Years in position | 5 years or less | 4.24 ± 0.69 | 4.05 ± 0.70 | 4.07 ± 0.70 | 3.58 ± 0.76 | 79.13 ± 12.14 |
| 6–10 years | 4.38 ± 0.54 | 4.10 ± 0.56 | 4.17 ± 0.56 | 3.60 ± 0.65 | 80.49 ± 8.48 |
|  | 11–15 years | 4.12 ± 0.69 | 4.13 ± 0.57 | 4.19 ± 0.61 | 3.56 ± 0.75 | 79.47 ± 10.60 |
|  | 16 years or more | 4.30 ± 0.55 | 4.19 ± 0.51 | 4.17 ± 0.54 | 3.66 ± 0.72 | 81.07 ± 9.11 |
|  | χ2(*P*) | 2.675 (0.047*) | 1.134 (0.335) | 0.801 (0.494) | 0.366 (0.777) | 0.858 (0.463) |
| Highest educational attainment | Associate degree or below | 4.36 ± 0.58 | 4.12 ± 0.65 | 4.18 ± 0.58 | 3.48 ± 0.75 | 79.83 ± 10.06 |
|  | Bachelor's degree | 4.26 ± 0.62 | 4.14 ± 0.57 | 4.17 ± 0.60 | 3.64 ± 0.72 | 80.49 ± 10.07 |
|  | Master's degree or higher | 4.03 ± 0.69 | 4.03 ± 0.57 | 3.96 ± 0.57 | 3.52 ± 0.68 | 77.33 ± 10.20 |
|  | Associate degree or below | 2.798 (0.062) | 0.493 (0.611) | 1.62 (0.199) | 1.523 (0.219) | 1.379 (0.253) |
| Job type | Clinical physician | 4.16 ± 0.62 | 4.15 ± 0.56 | 4.18 ± 0.56 | 3.72 ± 0.69 | 80.68 ± 9.87 |
|  | Nursing staff | 4.30 ± 0.63 | 4.07 ± 0.60 | 4.09 ± 0.62 | 3.48 ± 0.71 | 78.94 ± 9.99 |
|  | Auxiliary department staff | 4.69 ± 0.55 | 4.47 ± 0.56 | 4.52 ± 0.59 | 3.76 ± 0.78 | 86.30 ± 10.6 |
|  | Public health physician | 4.02 ± 0.34 | 3.87 ± 0.46 | 3.86 ± 0.37 | 3.53 ± 0.65 | 76.00 ± 6.78 |
|  | Other | 4.48 ± 0.51 | 4.24 ± 0.52 | 4.30 ± 0.65 | 3.75 ± 0.96 | 83.15 ± 11.37 |
|  | χ2(*P*) | 4.928 (0.001**) | 3.155 (0.014*) | 3.588 (0.007**) | 2.954 (0.020*) | 3.769 (0.005**) |
| Professional title | Junior | 4.28 ± 0.65 | 4.06 ± 0.68 | 4.11 ± 0.64 | 3.63 ± 0.75 | 79.81 ± 11.56 |
|  | Intermediate | 4.25 ± 0.61 | 4.13 ± 0.55 | 4.15 ± 0.57 | 3.61 ± 0.69 | 80.09 ± 9.56 |
|  | Senior | 4.25 ± 0.62 | 4.18 ± 0.53 | 4.19 ± 0.61 | 3.65 ± 0.76 | 80.82 ± 9.82 |
|  | None | 4.46 ± 0.58 | 4.26 ± 0.72 | 4.23 ± 0.77 | 3.11 ± 0.72 | 79.07 ± 12.15 |
|  | χ2(*P*) | 0.499 (0.683) | 0.783 (0.504) | 0.33 (0.803) | 2.165 (0.092) | 0.203 (0.894) |
| Average monthly salary (CNY) | Below 4,500 yuan | 4.14 ± 0.68 | 4.05 ± 0.71 | 4.08 ± 0.68 | 3.62 ± 0.73 | 79.00 ± 12.16 |
|  | 4,500–6,499 yuan | 4.31 ± 0.58 | 4.12 ± 0.53 | 4.17 ± 0.56 | 3.59 ± 0.72 | 80.33 ± 9.47 |
|  | 6,500–8,499 yuan | 4.29 ± 0.66 | 4.10 ± 0.56 | 4.06 ± 0.61 | 3.52 ± 0.72 | 79.24 ± 9.39 |
|  | 8,500 yuan or more | 4.25 ± 0.60 | 4.26 ± 0.53 | 4.26 ± 0.55 | 3.72 ± 0.70 | 82.01 ± 9.40 |
|  | Below 4,500 yuan | 1.585 (0.192) | 1.711 (0.164) | 1.723 (0.162) | 0.797 (0.496) | 1.294 (0.276) |

*Note.* *** *p* < 0.001; ** *p* < 0.01; * *p* < 0.05.

**Table C2. Summary of Variables in the Multilevel Mode.**

| **Level** | **Variable** | **Detailed Variables** |
| --- | --- | --- |
| 1 | Control Variable | Gender; Years in position; Job type; and Network Effective scale (RWFN, SWFN, FN, and AN) |
| 2 | Independent Variable | Network Consistency (RWFN–FN, RWFN–AN, SWFN–FN, and SWFN–AN) |

**Table C3. Variable Assignment Table.**

| **Variable** | **Variable Name** | **Variable assignment** |
| --- | --- | --- |
| Gender | X1 | **Male** = 0 |
|  |  | **Female** =1 |
| Years in position | X2 | 2–5 years (X11 = 0, 0, 0) |
|  |  | 6–10 years (X12 = 1, 0, 0) |
|  |  | 11–15 years (X13 = 0, 1, 0) |
|  |  | 16 years or more (X14 = 0, 0, 1) |
| Job type | X3 | Clinical physician (X15 = 0, 0, 0, 0) |
|  |  | Nursing staff (X16 = 1, 0, 0, 0) |
|  |  | Auxiliary department staff (X17 = 0, 1, 0, 0) |
|  |  | Public health physician (X18 = 0, 0, 1, 0) |
|  |  | Other (X19 = 0, 0, 0, 1) |

**Table C4. Robustness analysis.**

|  | | **TP** | | **RP** | | **LP** | | **IP** | | **WP** | |
| --- | --- | --- | --- | --- | --- | --- | --- | --- | --- | --- | --- |
| **Level 1**  **Standard Beta** | **Level 2**  **Standard Beta** | **Level 1**  **Standard Beta** | **Level 2**  **Standard Beta** | **Level 1**  **Standard Beta** | **Level 2**  **Standard Beta** | **Level 1**  **Standard Beta** | **Level 2**  **Standard Beta** | **Level 1**  **Standard Beta** | **Level 2**  **Standard Beta** |
| Gender (Reference group = male) | Female |  |  |  |  |  |  | –0.106 | –0.110 | –0.095 | –0.098 |
| Years in position (reference group = 2–5 years) | 6–10 years | 0.007 | 0.006 |  |  |  |  |  |  |  |  |
|  | 11–15 years | –0.158 | –0.151* |  |  |  |  |  |  |  |  |
| Dear | 6 years or more | –0.006 | 0.001 |  |  |  |  |  |  |  |  |
| Job type (Reference group = clinical doctor) | Nursing staff | 0.074 | 0.074 | –0.041 | –0.035 | –0.066 | –0.062 | –0.145* | –0.147* | –0.060 | –0.060 |
|  | Auxiliary department staff | 0.185*** | 0.180** | 0.107* | 0.100 | 0.123* | 0.111* | 0.003 | 0.000 | 0.124* | 0.114* |
|  | Public health physician | –0.03 | –0.031 | –0.080 | –0.080 | –0.094 | –0.094 | –0.051 | –0.053 | –0.077 | –0.082 |
|  | Others | 0.101 | 0.101 | 0.045 | 0.056 | 0.056 | 0.066 | -0.009 | –0.001 | 0.052 | 0.058 |
| Effective scale | RWFN | 0.049 | 0.057 | 0.147 | 0.145 | 0.111 | 0.115 | 0.208* | 0.22* | 0.170 | 0.182 |
|  | SWFN | –0.071 | –0.076 | –0.092 | –0.086 | –0.016 | –0.012 | –0.120 | –0.141 | –0.125 | –0.131 |
|  | FN | 0.073 | 0.066 | 0.143 | 0.135 | 0.035 | 0.022 | 0.040 | 0.020 | 0.099 | 0.081 |
|  | AN | –0.134 | –0.115 | –0.130* | –0.108 | –0.110 | –0.074 | –0.084 | –0.055 | –0.128 | –0.086 |
| Network consistency | RWFN–FN |  | –0.101 |  | –0.075 |  | –0.148 |  | –0.222* |  | –0.207* |
|  | RWFN–AN |  | 0.098 |  | 0.158 |  | 0.231* |  | 0.189* |  | 0.218* |
|  | SWFN–FN |  | –0.024 |  | 0.110 |  | 0.070 |  | 0.124 |  | 0.089 |
|  | SWFN–AN |  | –0.025 |  | –0.181 |  | –0.183 |  | –0.131 |  | –0.193* |
| R2 | | 0.079 | 0.086 | 0.049 | 0.064 | 0.048 | 0.072 | 0.073 | 0.090 | 0.070 | 0.096 |
| Adjusted R2 | | 0.048 | 0.043 | 0.026 | 0.029 | 0.025 | 0.038 | 0.047 | 0.530 | 0.440 | 0.059 |
| ΔR2 | | 0.079 | 0.006 | 0.049 | 0.015 | 0.048 | 0.024 | 0.073 | 0.017 | 0.070 | 0.026 |
| F | | 2.530** | 1.990* | 2.099* | 1.843* | 2.052* | 2.091* | 2.833** | 2.445** | 2.707** | 2.609** |
| ΔF | | 2.530** | 0.545 | 2.099* | 1.317 | 2.052* | 2.112 | 2.833** | 1.530 | 2.707** | 2.291 |
| VIFmax | | 3.070 | 3.445 | 3.065 | 3.434 | 3.065 | 3.434 | 3.066 | 3.436 | 3.066 | 3.436 |

*Notes.* TP = Task performance; RP = Relationship performance; LP = Learning performance; IP = Innovation performance; WP = Work performance. RWFN = Reciprocal workflow network; SWFN = Sequential workflow network; FN = Friendship Network; and AN = Advice Network.

*** *p ˂* 0.001; ** *p ˂* 0.01; * *p ˂* 0.05
